# Supplementary material for: Excess All-Cause Deaths during Coronavirus Disease Pandemic, Japan, January–May 2020
Source: PubMed Central journal article supplement (PMC7920666; doi:10.3201/eid2703.203925), 2021-03
Supplement: 20-3925-Techapp-s1.pdf [file 20-3925-Techapp-s1.pdf]

# Excess All-Cause Deaths during Coronavirus Disease Pandemic, Japan, January–May 2020

## Appendix

**Appendix Table 1.** Validity test results for reporting delays adjustment.

| Area      | Week ending date  | Difference* | Percent difference, % |
|-----------|-------------------|-------------|-----------------------|
| Hokkaido  | February 2, 2020  | 1           | 0.074                 |
| Hokkaido  | February 9, 2020  | -1          | -0.078                |
| Hokkaido  | February 16, 2020 | 2           | 0.148                 |
| Hokkaido  | February 23, 2020 | 2           | 0.165                 |
| Aomori    | February 2, 2020  | 0           | 0.000                 |
| Aomori    | February 9, 2020  | 0           | 0.000                 |
| Aomori    | February 16, 2020 | 1           | 0.292                 |
| Aomori    | February 23, 2020 | 0           | 0.000                 |
| Iwate     | February 2, 2020  | 0           | 0.000                 |
| Iwate     | February 9, 2020  | -1          | -0.264                |
| Iwate     | February 16, 2020 | 0           | 0.000                 |
| Iwate     | February 23, 2020 | -1          | -0.271                |
| Miyagi    | February 2, 2020  | 0           | 0.000                 |
| Miyagi    | February 9, 2020  | 0           | 0.000                 |
| Miyagi    | February 16, 2020 | 1           | 0.191                 |
| Miyagi    | February 23, 2020 | 0           | 0.000                 |
| Akita     | February 2, 2020  | 0           | 0.000                 |
| Akita     | February 9, 2020  | 0           | 0.000                 |
| Akita     | February 16, 2020 | 0           | 0.000                 |
| Akita     | February 23, 2020 | 0           | 0.000                 |
| Yamagata  | February 2, 2020  | 0           | 0.000                 |
| Yamagata  | February 9, 2020  | 0           | 0.000                 |
| Yamagata  | February 16, 2020 | 0           | 0.000                 |
| Yamagata  | February 23, 2020 | 0           | 0.000                 |
| Fukushima | February 2, 2020  | -1          | -0.199                |
| Fukushima | February 9, 2020  | -1          | -0.187                |
| Fukushima | February 16, 2020 | -1          | -0.190                |
| Fukushima | February 23, 2020 | -1          | -0.182                |
| Ibaraki   | February 2, 2020  | 1           | 0.137                 |
| Ibaraki   | February 9, 2020  | -1          | -0.139                |
| Ibaraki   | February 16, 2020 | -1          | -0.138                |
| Ibaraki   | February 23, 2020 | -1          | -0.155                |
| Tochigi   | February 2, 2020  | 0           | 0.000                 |
| Tochigi   | February 9, 2020  | 0           | 0.000                 |
| Tochigi   | February 16, 2020 | 1           | 0.209                 |
| Tochigi   | February 23, 2020 | 1           | 0.234                 |
| Gunma     | February 2, 2020  | -1          | -0.222                |
| Gunma     | February 9, 2020  | -1          | -0.202                |
| Gunma     | February 16, 2020 | -1          | -0.207                |
| Gunma     | February 23, 2020 | -1          | -0.210                |
| Saitama   | February 2, 2020  | 3           | 0.198                 |
| Saitama   | February 9, 2020  | -3          | -0.219                |
| Saitama   | February 16, 2020 | 1           | 0.068                 |
| Saitama   | February 23, 2020 | -2          | -0.148                |
| Chiba     | February 2, 2020  | 0           | 0.000                 |
| Chiba     | February 9, 2020  | -1          | -0.082                |

| Area      | Week ending date  | Difference* | Percent difference, % |
|-----------|-------------------|-------------|-----------------------|
| Chiba     | February 16, 2020 | 0           | 0.000                 |
| Chiba     | February 23, 2020 | -1          | -0.084                |
| Tokyo     | February 2, 2020  | 5           | 0.195                 |
| Tokyo     | February 9, 2020  | -2          | -0.083                |
| Tokyo     | February 16, 2020 | 4           | 0.161                 |
| Tokyo     | February 23, 2020 | 2           | 0.083                 |
| Kanagawa  | February 2, 2020  | 3           | 0.167                 |
| Kanagawa  | February 9, 2020  | -3          | -0.170                |
| Kanagawa  | February 16, 2020 | 1           | 0.054                 |
| Kanagawa  | February 23, 2020 | 0           | 0.000                 |
| Niigata   | February 2, 2020  | 0           | 0.000                 |
| Niigata   | February 9, 2020  | 0           | 0.000                 |
| Niigata   | February 16, 2020 | 1           | 0.168                 |
| Niigata   | February 23, 2020 | 0           | 0.000                 |
| Toyama    | February 2, 2020  | -1          | -0.415                |
| Toyama    | February 9, 2020  | -1          | -0.395                |
| Toyama    | February 16, 2020 | 0           | 0.000                 |
| Toyama    | February 23, 2020 | -1          | -0.342                |
| Ishikawa  | February 2, 2020  | 0           | 0.000                 |
| Ishikawa  | February 9, 2020  | 0           | 0.000                 |
| Ishikawa  | February 16, 2020 | 0           | 0.000                 |
| Ishikawa  | February 23, 2020 | 0           | 0.000                 |
| Fukui     | February 2, 2020  | 0           | 0.000                 |
| Fukui     | February 9, 2020  | 0           | 0.000                 |
| Fukui     | February 16, 2020 | 0           | 0.000                 |
| Fukui     | February 23, 2020 | 0           | 0.000                 |
| Yamanashi | February 2, 2020  | 0           | 0.000                 |
| Yamanashi | February 9, 2020  | 0           | 0.000                 |
| Yamanashi | February 16, 2020 | 1           | 0.478                 |
| Yamanashi | February 23, 2020 | 0           | 0.000                 |
| Nagano    | February 2, 2020  | -1          | -0.189                |
| Nagano    | February 9, 2020  | -1          | -0.187                |
| Nagano    | February 16, 2020 | -1          | -0.182                |
| Nagano    | February 23, 2020 | -1          | -0.180                |
| Gifu      | February 2, 2020  | 0           | 0.000                 |
| Gifu      | February 9, 2020  | -1          | -0.217                |
| Gifu      | February 16, 2020 | -1          | -0.200                |
| Gifu      | February 23, 2020 | 0           | 0.000                 |
| Shizuoka  | February 2, 2020  | -1          | -0.111                |
| Shizuoka  | February 9, 2020  | -1          | -0.112                |
| Shizuoka  | February 16, 2020 | -1          | -0.107                |
| Shizuoka  | February 23, 2020 | 0           | 0.000                 |
| Aichi     | February 2, 2020  | 1           | 0.067                 |
| Aichi     | February 9, 2020  | -1          | -0.067                |
| Aichi     | February 16, 2020 | 2           | 0.134                 |
| Aichi     | February 23, 2020 | 0           | 0.000                 |
| Mie       | February 2, 2020  | 1           | 0.237                 |
| Mie       | February 9, 2020  | 0           | 0.000                 |
| Mie       | February 16, 2020 | 0           | 0.000                 |
| Mie       | February 23, 2020 | 0           | 0.000                 |
| Shiga     | February 2, 2020  | 0           | 0.000                 |
| Shiga     | February 9, 2020  | 0           | 0.000                 |
| Shiga     | February 16, 2020 | 0           | 0.000                 |
| Shiga     | February 23, 2020 | 0           | 0.000                 |
| Kyoto     | February 2, 2020  | -1          | -0.177                |
| Kyoto     | February 9, 2020  | -1          | -0.178                |
| Kyoto     | February 16, 2020 | 0           | 0.000                 |
| Kyoto     | February 23, 2020 | -1          | -0.189                |
| Osaka     | February 2, 2020  | 2           | 0.109                 |
| Osaka     | February 9, 2020  | 0           | 0.000                 |
| Osaka     | February 16, 2020 | 1           | 0.051                 |
| Osaka     | February 23, 2020 | 1           | 0.055                 |
| Hyogo     | February 2, 2020  | 1           | 0.079                 |
| Hyogo     | February 9, 2020  | -1          | -0.085                |
| Hyogo     | February 16, 2020 | 1           | 0.081                 |
| Hyogo     | February 23, 2020 | 0           | 0.000                 |
| Nara      | February 2, 2020  | -1          | -0.294                |
| Nara      | February 9, 2020  | -1          | -0.300                |
| Nara      | February 16, 2020 | -1          | -0.326                |

| Area      | Week ending date  | Difference* | Percent difference, % |
|-----------|-------------------|-------------|-----------------------|
| Nara      | February 23, 2020 | -1          | -0.353                |
| Wakayama  | February 2, 2020  | 0           | 0.000                 |
| Wakayama  | February 9, 2020  | 0           | 0.000                 |
| Wakayama  | February 16, 2020 | 0           | 0.000                 |
| Wakayama  | February 23, 2020 | 0           | 0.000                 |
| Tottori   | February 2, 2020  | 1           | 0.694                 |
| Tottori   | February 9, 2020  | 0           | 0.000                 |
| Tottori   | February 16, 2020 | 0           | 0.000                 |
| Tottori   | February 23, 2020 | 0           | 0.000                 |
| Shimane   | February 2, 2020  | -1          | -0.503                |
| Shimane   | February 9, 2020  | -1          | -0.446                |
| Shimane   | February 16, 2020 | -1          | -0.461                |
| Shimane   | February 23, 2020 | 0           | 0.000                 |
| Okayama   | February 2, 2020  | 0           | 0.000                 |
| Okayama   | February 9, 2020  | 0           | 0.000                 |
| Okayama   | February 16, 2020 | 0           | 0.000                 |
| Okayama   | February 23, 2020 | 0           | 0.000                 |
| Hiroshima | February 2, 2020  | 0           | 0.000                 |
| Hiroshima | February 9, 2020  | -1          | -0.166                |
| Hiroshima | February 16, 2020 | -1          | -0.156                |
| Hiroshima | February 23, 2020 | 0           | 0.000                 |
| Yamaguchi | February 2, 2020  | -1          | -0.252                |
| Yamaguchi | February 9, 2020  | -1          | -0.253                |
| Yamaguchi | February 16, 2020 | -1          | -0.248                |
| Yamaguchi | February 23, 2020 | -1          | -0.256                |
| Tokushima | February 2, 2020  | 0           | 0.000                 |
| Tokushima | February 9, 2020  | 0           | 0.000                 |
| Tokushima | February 16, 2020 | 0           | 0.000                 |
| Tokushima | February 23, 2020 | 0           | 0.000                 |
| Kagawa    | February 2, 2020  | 0           | 0.000                 |
| Kagawa    | February 9, 2020  | 0           | 0.000                 |
| Kagawa    | February 16, 2020 | 0           | 0.000                 |
| Kagawa    | February 23, 2020 | 0           | 0.000                 |
| Ehime     | February 2, 2020  | 0           | 0.000                 |
| Ehime     | February 9, 2020  | 0           | 0.000                 |
| Ehime     | February 16, 2020 | 0           | 0.000                 |
| Ehime     | February 23, 2020 | 0           | 0.000                 |
| Kochi     | February 2, 2020  | -1          | -0.426                |
| Kochi     | February 9, 2020  | -1          | -0.433                |
| Kochi     | February 16, 2020 | -1          | -0.431                |
| Kochi     | February 23, 2020 | -1          | -0.498                |
| Fukuoka   | February 2, 2020  | 5           | 0.441                 |
| Fukuoka   | February 9, 2020  | -1          | -0.092                |
| Fukuoka   | February 16, 2020 | -1          | -0.088                |
| Fukuoka   | February 23, 2020 | 1           | 0.092                 |
| Saga      | February 2, 2020  | 0           | 0.000                 |
| Saga      | February 9, 2020  | 0           | 0.000                 |
| Saga      | February 16, 2020 | 0           | 0.000                 |
| Saga      | February 23, 2020 | 0           | 0.000                 |
| Nagasaki  | February 2, 2020  | 1           | 0.287                 |
| Nagasaki  | February 9, 2020  | 0           | 0.000                 |
| Nagasaki  | February 16, 2020 | 0           | 0.000                 |
| Nagasaki  | February 23, 2020 | 0           | 0.000                 |
| Kumamoto  | February 2, 2020  | 0           | 0.000                 |
| Kumamoto  | February 9, 2020  | 1           | 0.220                 |
| Kumamoto  | February 16, 2020 | 0           | 0.000                 |
| Kumamoto  | February 23, 2020 | 0           | 0.000                 |
| Oita      | February 2, 2020  | 0           | 0.000                 |
| Oita      | February 9, 2020  | 0           | 0.000                 |
| Oita      | February 16, 2020 | 0           | 0.000                 |
| Oita      | February 23, 2020 | 0           | 0.000                 |
| Miyazaki  | February 2, 2020  | 0           | 0.000                 |
| Miyazaki  | February 9, 2020  | 0           | 0.000                 |
| Miyazaki  | February 16, 2020 | 1           | 0.351                 |
| Miyazaki  | February 23, 2020 | 0           | 0.000                 |
| Kagoshima | February 2, 2020  | 0           | 0.000                 |
| Kagoshima | February 9, 2020  | 0           | 0.000                 |
| Kagoshima | February 16, 2020 | 1           | 0.199                 |
| Kagoshima | February 23, 2020 | 0           | 0.000                 |

| Area    | Week ending date  | Difference* | Percent difference, % |
|---------|-------------------|-------------|-----------------------|
| Okinawa | February 2, 2020  | -1          | -0.403                |
| Okinawa | February 9, 2020  | -1          | -0.385                |
| Okinawa | February 16, 2020 | -1          | -0.388                |
| Okinawa | February 23, 2020 | -1          | -0.389                |

\*Difference is the observed number of all-cause deaths for all ages in February based on up to the May prompt vital statistics with no adjustment for the reporting delay minus those based on up to the April prompt vital statistics with the adjustment for delays in reporting in May. Proportion difference refers to the proportion of the difference to the latter.

**Appendix Table 2.** Results of sensitivity analyses, excess all-cause death, and percent all-cause excess deaths for all ages,

December 30, 2019 through May 31, 2020\*

| Area      | (a) b=3, w=2 |           | (b) b=4, w=2 |           | (c) b=3, w=4 |           | (d) b=4, w=4 |           |
|-----------|--------------|-----------|--------------|-----------|--------------|-----------|--------------|-----------|
| Japan     | 360-5363     | 0.06-0.90 | 358-5307     | 0.06-0.89 | 353-5843     | 0.06-0.98 | 324-5489     | 0.05-0.92 |
| Hokkaido  | 0-95         | 0.00-0.34 | 0-109        | 0.00-0.39 | 0-115        | 0.00-0.42 | 0-134        | 0.00-0.48 |
| Aomori    | 0-21         | 0.00-0.27 | 0-25         | 0.00-0.32 | 0-30         | 0.00-0.39 | 0-34         | 0.00-0.44 |
| Iwate     | 0-82         | 0.00-1.08 | 0-93         | 0.00-1.23 | 1-100        | 0.01-1.32 | 0-100        | 0.00-1.32 |
| Miyagi    | 0-46         | 0.00-0.43 | 0-44         | 0.00-0.41 | 0-58         | 0.00-0.54 | 0-60         | 0.00-0.56 |
| Akita     | 0-61         | 0.00-0.92 | 0-89         | 0.00-1.34 | 0-80         | 0.00-1.20 | 0-92         | 0.00-1.38 |
| Yamagata  | 0-44         | 0.00-0.67 | 0-57         | 0.00-0.86 | 0-50         | 0.00-0.76 | 0-60         | 0.00-0.91 |
| Fukushima | 0-86         | 0.00-0.80 | 0-53         | 0.00-0.49 | 0-93         | 0.00-0.87 | 0-59         | 0.00-0.55 |
| Ibaraki   | 3-107        | 0.02-0.74 | 8-107        | 0.06-0.74 | 2-102        | 0.01-0.71 | 4-97         | 0.03-0.67 |
| Tochigi   | 15-159       | 0.16-1.65 | 16-167       | 0.17-1.74 | 25-177       | 0.26-1.84 | 27-180       | 0.28-1.87 |
| Gunma     | 25-129       | 0.25-1.27 | 35-176       | 0.34-1.73 | 39-164       | 0.38-1.61 | 46-190       | 0.45-1.87 |
| Saitama   | 22-394       | 0.07-1.29 | 20-365       | 0.07-1.20 | 39-445       | 0.13-1.46 | 32-390       | 0.11-1.28 |
| Chiba     | 55-277       | 0.20-1.03 | 49-241       | 0.18-0.90 | 40-289       | 0.15-1.08 | 35-247       | 0.13-0.92 |
| Tokyo     | 73-459       | 0.14-0.88 | 80-438       | 0.15-0.84 | 62-466       | 0.12-0.89 | 58-424       | 0.11-0.81 |
| Kanagawa  | 0-103        | 0.00-0.28 | 0-113        | 0.00-0.31 | 0-92         | 0.00-0.25 | 0-94         | 0.00-0.26 |
| Niigata   | 0-0          | 0.00-0.00 | 0-0          | 0.00-0.00 | 0-5          | 0.00-0.04 | 0-0          | 0.00-0.00 |
| Toyama    | 39-186       | 0.69-3.27 | 33-158       | 0.58-2.78 | 36-179       | 0.63-3.15 | 28-151       | 0.49-2.65 |
| Ishikawa  | 0-50         | 0.00-0.90 | 0-60         | 0.00-1.08 | 0-57         | 0.00-1.03 | 0-67         | 0.00-1.21 |
| Fukui     | 0-39         | 0.00-0.96 | 0-78         | 0.00-1.93 | 0-42         | 0.00-1.04 | 0-77         | 0.00-1.90 |
| Yamanashi | 0-52         | 0.00-1.22 | 0-52         | 0.00-1.22 | 0-65         | 0.00-1.52 | 0-52         | 0.00-1.22 |
| Nagano    | 0-75         | 0.00-0.67 | 0-81         | 0.00-0.73 | 0-81         | 0.00-0.73 | 0-84         | 0.00-0.75 |
| Gifu      | 0-40         | 0.00-0.40 | 0-34         | 0.00-0.34 | 0-47         | 0.00-0.48 | 0-38         | 0.00-0.38 |
| Shizuoka  | 17-127       | 0.09-0.68 | 15-120       | 0.08-0.65 | 11-186       | 0.06-1.00 | 11-155       | 0.06-0.84 |
| Aichi     | 14-232       | 0.05-0.76 | 13-240       | 0.04-0.78 | 8-236        | 0.03-0.77 | 12-235       | 0.04-0.77 |
| Mie       | 0-49         | 0.00-0.54 | 0-70         | 0.00-0.77 | 0-66         | 0.00-0.73 | 0-77         | 0.00-0.85 |
| Shiga     | 1-97         | 0.02-1.73 | 2-86         | 0.04-1.53 | 0-92         | 0.00-1.64 | 0-78         | 0.00-1.39 |
| Kyoto     | 0-94         | 0.00-0.80 | 0-87         | 0.00-0.74 | 0-105        | 0.00-0.89 | 0-100        | 0.00-0.85 |
| Osaka     | 16-280       | 0.04-0.70 | 22-295       | 0.05-0.74 | 11-284       | 0.03-0.71 | 11-271       | 0.03-0.68 |
| Hyogo     | 0-108        | 0.00-0.42 | 0-106        | 0.00-0.42 | 0-135        | 0.00-0.53 | 0-118        | 0.00-0.46 |
| Nara      | 30-129       | 0.46-1.99 | 26-108       | 0.40-1.67 | 30-140       | 0.46-2.16 | 22-110       | 0.34-1.70 |
| Wakayama  | 0-91         | 0.00-1.64 | 0-76         | 0.00-1.37 | 0-103        | 0.00-1.86 | 0-82         | 0.00-1.48 |
| Tottori   | 0-34         | 0.00-1.08 | 0-39         | 0.00-1.24 | 0-45         | 0.00-1.43 | 0-45         | 0.00-1.43 |
| Shimane   | 5-101        | 0.12-2.40 | 0-83         | 0.00-1.97 | 2-96         | 0.05-2.28 | 0-82         | 0.00-1.95 |
| Okayama   | 0-54         | 0.00-0.57 | 0-71         | 0.00-0.75 | 0-59         | 0.00-0.62 | 0-72         | 0.00-0.76 |
| Hiroshima | 0-65         | 0.00-0.49 | 0-67         | 0.00-0.51 | 0-58         | 0.00-0.44 | 0-61         | 0.00-0.46 |
| Yamaguchi | 0-65         | 0.00-0.80 | 0-70         | 0.00-0.86 | 0-72         | 0.00-0.88 | 0-72         | 0.00-0.88 |
| Tokushima | 8-96         | 0.18-2.21 | 8-87         | 0.18-2.01 | 7-99         | 0.16-2.28 | 7-90         | 0.16-2.07 |
| Kagawa    | 13-170       | 0.24-3.16 | 9-143        | 0.17-2.66 | 7-176        | 0.13-3.28 | 4-156        | 0.07-2.90 |
| Ehime     | 0-90         | 0.00-1.14 | 0-80         | 0.00-1.01 | 0-110        | 0.00-1.39 | 0-94         | 0.00-1.19 |
| Kochi     | 2-75         | 0.05-1.71 | 2-86         | 0.05-1.96 | 1-80         | 0.02-1.83 | 0-90         | 0.00-2.05 |
| Fukuoka   | 2-159        | 0.01-0.68 | 5-142        | 0.02-0.61 | 10-148       | 0.04-0.63 | 11-124       | 0.05-0.53 |
| Saga      | 0-94         | 0.00-2.13 | 0-74         | 0.00-1.68 | 0-105        | 0.00-2.38 | 0-80         | 0.00-1.81 |
| Nagasaki  | 0-138        | 0.00-1.80 | 0-105        | 0.00-1.37 | 0-145        | 0.00-1.89 | 0-112        | 0.00-1.46 |
| Kumamoto  | 0-118        | 0.00-1.26 | 0-128        | 0.00-1.37 | 0-131        | 0.00-1.40 | 1-138        | 0.01-1.48 |
| Oita      | 10-78        | 0.16-1.24 | 10-81        | 0.16-1.29 | 9-87         | 0.14-1.39 | 8-89         | 0.13-1.42 |
| Miyazaki  | 10-182       | 0.16-2.98 | 5-156        | 0.08-2.56 | 13-191       | 0.21-3.13 | 7-167        | 0.11-2.74 |
| Kagoshima | 0-77         | 0.00-0.83 | 0-107        | 0.00-1.15 | 0-86         | 0.00-0.92 | 0-102        | 0.00-1.10 |
| Okinawa   | 0-55         | 0.00-1.03 | 0-60         | 0.00-1.12 | 0-71         | 0.00-1.33 | 0-59         | 0.00-1.11 |

\*In the sensitivity analyses, the reference period was changed to confirm the robustness of the results ('b' years ago, 'w' weeks before and after).

**Appendix Table 3.** Number of observed and excess all-cause deaths from December 30, 2019 to May 31, 2020, by age groups\*

| Age group, area           | Observed all-cause deaths | Excess all-cause deaths | Percent all-cause excess deaths |
|---------------------------|---------------------------|-------------------------|---------------------------------|
| <b>(1) under 25 years</b> |                           |                         |                                 |
| Japan                     | 2915                      | 47–751                  | 1.61–25.76                      |
| Hokkaido                  | 103                       | 0–19                    | 0.00–18.45                      |
| Aomori                    | 35                        | 0–16                    | 0.00–45.71                      |
| Iwate                     | 29                        | 0–14                    | 0.00–48.28                      |
| Miyagi                    | 52                        | 1–14                    | 1.92–26.92                      |
| Akita                     | 27                        | 2–12                    | 7.41–44.44                      |
| Yamagata                  | 26                        | 0–7                     | 0.00–26.92                      |
| Fukushima                 | 53                        | 1–19                    | 1.89–35.85                      |
| Ibaraki                   | 82                        | 1–25                    | 1.22–30.49                      |
| Tochigi                   | 53                        | 0–10                    | 0.00–18.87                      |
| Gunma                     | 41                        | 0–10                    | 0.00–24.39                      |
| Saitama                   | 148                       | 2–24                    | 1.35–16.22                      |
| Chiba                     | 130                       | 1–15                    | 0.77–11.54                      |
| Tokyo                     | 262                       | 3–20                    | 1.15–7.63                       |
| Kanagawa                  | 168                       | 0–16                    | 0.00–9.52                       |
| Niigata                   | 44                        | 0–15                    | 0.00–34.09                      |
| Toyama                    | 19                        | 0–6                     | 0.00–31.58                      |
| Ishikawa                  | 31                        | 1–14                    | 3.23–45.16                      |
| Fukui                     | 29                        | 1–16                    | 3.45–55.17                      |
| Yamanashi                 | 14                        | 0–3                     | 0.00–21.43                      |
| Nagano                    | 70                        | 0–21                    | 0.00–30.00                      |
| Gifu                      | 52                        | 3–22                    | 5.77–42.31                      |
| Shizuoka                  | 103                       | 4–33                    | 3.88–32.04                      |
| Aichi                     | 198                       | 5–48                    | 2.53–24.24                      |
| Mie                       | 53                        | 2–27                    | 3.77–50.94                      |
| Shiga                     | 41                        | 2–20                    | 4.88–48.78                      |
| Kyoto                     | 47                        | 0–12                    | 0.00–25.53                      |
| Osaka                     | 191                       | 0–7                     | 0.00–3.66                       |
| Hyogo                     | 127                       | 1–32                    | 0.79–25.20                      |
| Nara                      | 34                        | 1–16                    | 2.94–47.06                      |
| Wakayama                  | 13                        | 2–6                     | 15.38–46.15                     |
| Tottori                   | 11                        | 0–4                     | 0.00–36.36                      |
| Shimane                   | 21                        | 2–11                    | 9.52–52.38                      |
| Okayama                   | 57                        | 1–23                    | 1.75–40.35                      |
| Hiroshima                 | 53                        | 1–12                    | 1.89–22.64                      |
| Yamaguchi                 | 31                        | 0–15                    | 0.00–48.39                      |
| Tokushima                 | 25                        | 1–13                    | 4.00–52.00                      |
| Kagawa                    | 29                        | 1–14                    | 3.45–48.28                      |
| Ehime                     | 30                        | 1–12                    | 3.33–40.00                      |
| Kochi                     | 22                        | 1–9                     | 4.55–40.91                      |
| Fukuoka                   | 114                       | 0–9                     | 0.00–7.89                       |
| Saga                      | 17                        | 0–6                     | 0.00–35.29                      |
| Nagasaki                  | 36                        | 1–16                    | 2.78–44.44                      |
| Kumamoto                  | 51                        | 0–21                    | 0.00–41.18                      |
| Oita                      | 22                        | 1–12                    | 4.55–54.55                      |
| Miyazaki                  | 28                        | 0–11                    | 0.00–39.29                      |
| Kagoshima                 | 52                        | 3–22                    | 5.77–42.31                      |
| Okinawa                   | 41                        | 1–22                    | 2.44–53.66                      |
| <b>(2) 25–44 years</b>    |                           |                         |                                 |
| Japan                     | 7815                      | 66–1302                 | 0.84–16.66                      |
| Hokkaido                  | 344                       | 0–32                    | 0.00–9.30                       |
| Aomori                    | 91                        | 0–14                    | 0.00–15.38                      |
| Iwate                     | 78                        | 0–18                    | 0.00–23.08                      |
| Miyagi                    | 183                       | 4–49                    | 2.19–26.78                      |
| Akita                     | 67                        | 1–21                    | 1.49–31.34                      |
| Yamagata                  | 88                        | 2–36                    | 2.27–40.91                      |
| Fukushima                 | 133                       | 0–22                    | 0.00–16.54                      |
| Ibaraki                   | 225                       | 10–54                   | 4.44–24.00                      |
| Tochigi                   | 133                       | 0–22                    | 0.00–16.54                      |
| Gunma                     | 122                       | 3–21                    | 2.46–17.21                      |
| Saitama                   | 450                       | 0–24                    | 0.00–5.33                       |
| Chiba                     | 414                       | 0–56                    | 0.00–13.53                      |

| Age group, area | Observed all-cause deaths | Excess all-cause deaths | Percent all-cause excess deaths |
|-----------------|---------------------------|-------------------------|---------------------------------|
| Tokyo           | 809                       | 8-67                    | 0.99-8.28                       |
| Kanagawa        | 537                       | 2-61                    | 0.37-11.36                      |
| Niigata         | 130                       | 0-16                    | 0.00-12.31                      |
| Toyama          | 71                        | 0-27                    | 0.00-38.03                      |
| Ishikawa        | 63                        | 6-24                    | 9.52-38.10                      |
| Fukui           | 51                        | 0-18                    | 0.00-35.29                      |
| Yamanashi       | 47                        | 1-19                    | 2.13-40.43                      |
| Nagano          | 108                       | 1-21                    | 0.93-19.44                      |
| Gifu            | 101                       | 1-14                    | 0.99-13.86                      |
| Shizuoka        | 253                       | 4-63                    | 1.58-24.90                      |
| Aichi           | 423                       | 0-30                    | 0.00-7.09                       |
| Mie             | 106                       | 0-28                    | 0.00-26.42                      |
| Shiga           | 82                        | 2-23                    | 2.44-28.05                      |
| Kyoto           | 138                       | 0-25                    | 0.00-18.12                      |
| Osaka           | 542                       | 3-73                    | 0.55-13.47                      |
| Hyogo           | 289                       | 4-39                    | 1.38-13.49                      |
| Nara            | 74                        | 1-18                    | 1.35-24.32                      |
| Wakayama        | 60                        | 0-10                    | 0.00-16.67                      |
| Tottori         | 32                        | 0-9                     | 0.00-28.13                      |
| Shimane         | 45                        | 2-21                    | 4.44-46.67                      |
| Okayama         | 104                       | 0-16                    | 0.00-15.38                      |
| Hiroshima       | 156                       | 1-20                    | 0.64-12.82                      |
| Yamaguchi       | 81                        | 1-28                    | 1.23-34.57                      |
| Tokushima       | 47                        | 0-11                    | 0.00-23.40                      |
| Kagawa          | 65                        | 1-23                    | 1.54-35.38                      |
| Ehime           | 91                        | 0-19                    | 0.00-20.88                      |
| Kochi           | 45                        | 0-17                    | 0.00-37.78                      |
| Fukuoka         | 324                       | 2-46                    | 0.62-14.20                      |
| Saga            | 37                        | 0-8                     | 0.00-21.62                      |
| Nagasaki        | 75                        | 0-15                    | 0.00-20.00                      |
| Kumamoto        | 111                       | 4-40                    | 3.60-36.04                      |
| Oita            | 70                        | 0-15                    | 0.00-21.43                      |
| Miyazaki        | 84                        | 2-31                    | 2.38-36.90                      |
| Kagoshima       | 114                       | 0-19                    | 0.00-16.67                      |
| Okinawa         | 122                       | 0-19                    | 0.00-15.57                      |
| (3) 45-64 years |                           |                         |                                 |
| Japan           | 44375                     | 207-2958                | 0.47-6.67                       |
| Hokkaido        | 2118                      | 5-131                   | 0.24-6.19                       |
| Aomori          | 648                       | 10-62                   | 1.54-9.57                       |
| Iwate           | 530                       | 3-44                    | 0.57-8.30                       |
| Miyagi          | 817                       | 4-73                    | 0.49-8.94                       |
| Akita           | 435                       | 0-48                    | 0.00-11.03                      |
| Yamagata        | 432                       | 9-73                    | 2.08-16.90                      |
| Fukushima       | 781                       | 0-37                    | 0.00-4.74                       |
| Ibaraki         | 1120                      | 3-72                    | 0.27-6.43                       |
| Tochigi         | 794                       | 13-77                   | 1.64-9.70                       |
| Gunma           | 645                       | 0-29                    | 0.00-4.50                       |
| Saitama         | 2716                      | 12-212                  | 0.44-7.81                       |
| Chiba           | 2226                      | 0-56                    | 0.00-2.52                       |
| Tokyo           | 4579                      | 23-183                  | 0.50-4.00                       |
| Kanagawa        | 3054                      | 11-162                  | 0.36-5.30                       |
| Niigata         | 777                       | 0-26                    | 0.00-3.35                       |
| Toyama          | 332                       | 1-18                    | 0.30-5.42                       |
| Ishikawa        | 335                       | 1-38                    | 0.30-11.34                      |
| Fukui           | 240                       | 7-43                    | 2.92-17.92                      |
| Yamanashi       | 297                       | 0-25                    | 0.00-8.42                       |
| Nagano          | 639                       | 0-47                    | 0.00-7.36                       |
| Gifu            | 623                       | 0-40                    | 0.00-6.42                       |
| Shizuoka        | 1268                      | 4-101                   | 0.32-7.97                       |
| Aichi           | 2337                      | 11-104                  | 0.47-4.45                       |
| Mie             | 592                       | 5-57                    | 0.84-9.63                       |
| Shiga           | 341                       | 0-19                    | 0.00-5.57                       |
| Kyoto           | 736                       | 0-19                    | 0.00-2.58                       |
| Osaka           | 3178                      | 32-156                  | 1.01-4.91                       |
| Hyogo           | 1767                      | 9-68                    | 0.51-3.85                       |
| Nara            | 449                       | 0-38                    | 0.00-8.46                       |
| Wakayama        | 355                       | 0-40                    | 0.00-11.27                      |

| Age group, area | Observed all-cause deaths | Excess all-cause deaths | Percent all-cause excess deaths |
|-----------------|---------------------------|-------------------------|---------------------------------|
| Tottori         | 212                       | 5-42                    | 2.36-19.81                      |
| Shimane         | 219                       | 0-21                    | 0.00-9.59                       |
| Okayama         | 551                       | 0-28                    | 0.00-5.08                       |
| Hiroshima       | 926                       | 2-71                    | 0.22-7.67                       |
| Yamaguchi       | 532                       | 8-75                    | 1.50-14.10                      |
| Tokushima       | 270                       | 0-32                    | 0.00-11.85                      |
| Kagawa          | 328                       | 0-39                    | 0.00-11.89                      |
| Ehime           | 528                       | 0-39                    | 0.00-7.39                       |
| Kochi           | 281                       | 13-51                   | 4.63-18.15                      |
| Fukuoka         | 1740                      | 9-89                    | 0.52-5.11                       |
| Saga            | 316                       | 0-43                    | 0.00-13.61                      |
| Nagasaki        | 554                       | 1-75                    | 0.18-13.54                      |
| Kumamoto        | 635                       | 0-69                    | 0.00-10.87                      |
| Oita            | 339                       | 0-6                     | 0.00-1.77                       |
| Miyazaki        | 457                       | 6-75                    | 1.31-16.41                      |
| Kagoshima       | 686                       | 0-79                    | 0.00-11.52                      |
| Okinawa         | 640                       | 0-26                    | 0.00-4.06                       |
| (4) 65-74 years |                           |                         |                                 |
| Japan           | 85102                     | 143-2959                | 0.17-3.48                       |
| Hokkaido        | 4192                      | 8-131                   | 0.19-3.13                       |
| Aomori          | 1169                      | 5-45                    | 0.43-3.85                       |
| Iwate           | 1026                      | 3-64                    | 0.29-6.24                       |
| Miyagi          | 1492                      | 0-59                    | 0.00-3.95                       |
| Akita           | 877                       | 4-89                    | 0.46-10.15                      |
| Yamagata        | 776                       | 0-26                    | 0.00-3.35                       |
| Fukushima       | 1528                      | 6-108                   | 0.39-7.07                       |
| Ibaraki         | 2181                      | 0-56                    | 0.00-2.57                       |
| Tochigi         | 1480                      | 1-56                    | 0.07-3.78                       |
| Gunma           | 1491                      | 0-56                    | 0.00-3.76                       |
| Saitama         | 4951                      | 0-113                   | 0.00-2.28                       |
| Chiba           | 4143                      | 2-77                    | 0.05-1.86                       |
| Tokyo           | 7451                      | 22-139                  | 0.30-1.87                       |
| Kanagawa        | 5236                      | 0-50                    | 0.00-0.95                       |
| Niigata         | 1642                      | 0-56                    | 0.00-3.41                       |
| Toyama          | 755                       | 2-50                    | 0.26-6.62                       |
| Ishikawa        | 773                       | 20-85                   | 2.59-11.00                      |
| Fukui           | 500                       | 1-56                    | 0.20-11.20                      |
| Yamanashi       | 508                       | 0-43                    | 0.00-8.46                       |
| Nagano          | 1323                      | 4-90                    | 0.30-6.80                       |
| Gifu            | 1272                      | 2-35                    | 0.16-2.75                       |
| Shizuoka        | 2619                      | 0-57                    | 0.00-2.18                       |
| Aichi           | 4534                      | 5-107                   | 0.11-2.36                       |
| Mie             | 1160                      | 0-24                    | 0.00-2.07                       |
| Shiga           | 750                       | 0-32                    | 0.00-4.27                       |
| Kyoto           | 1613                      | 0-67                    | 0.00-4.15                       |
| Osaka           | 6312                      | 5-105                   | 0.08-1.66                       |
| Hyogo           | 3554                      | 11-97                   | 0.31-2.73                       |
| Nara            | 812                       | 9-34                    | 1.11-4.19                       |
| Wakayama        | 757                       | 1-70                    | 0.13-9.25                       |
| Tottori         | 440                       | 0-44                    | 0.00-10.00                      |
| Shimane         | 507                       | 0-54                    | 0.00-10.65                      |
| Okayama         | 1320                      | 14-108                  | 1.06-8.18                       |
| Hiroshima       | 1853                      | 6-66                    | 0.32-3.56                       |
| Yamaguchi       | 1152                      | 2-65                    | 0.17-5.64                       |
| Tokushima       | 580                       | 0-53                    | 0.00-9.14                       |
| Kagawa          | 761                       | 2-79                    | 0.26-10.38                      |
| Ehime           | 1101                      | 0-28                    | 0.00-2.54                       |
| Kochi           | 586                       | 0-19                    | 0.00-3.24                       |
| Fukuoka         | 3493                      | 0-75                    | 0.00-2.15                       |
| Saga            | 575                       | 0-15                    | 0.00-2.61                       |
| Nagasaki        | 1022                      | 0-15                    | 0.00-1.47                       |
| Kumamoto        | 1177                      | 4-64                    | 0.34-5.44                       |
| Oita            | 805                       | 2-51                    | 0.25-6.34                       |
| Miyazaki        | 781                       | 0-36                    | 0.00-4.61                       |
| Kagoshima       | 1245                      | 0-63                    | 0.00-5.06                       |
| Okinawa         | 827                       | 2-47                    | 0.24-5.68                       |

| Age group, area              | Observed all-cause deaths | Excess all-cause deaths | Percent all-cause excess deaths |
|------------------------------|---------------------------|-------------------------|---------------------------------|
| <b>(5) 75–84 years</b>       |                           |                         |                                 |
| Japan                        | 166547                    | 110–3100                | 0.07–1.86                       |
| Hokkaido                     | 7635                      | 0–86                    | 0.00–1.13                       |
| Aomori                       | 2157                      | 3–69                    | 0.14–3.20                       |
| Iwate                        | 1991                      | 0–63                    | 0.00–3.16                       |
| Miyagi                       | 2854                      | 4–76                    | 0.14–2.66                       |
| Akita                        | 1702                      | 5–107                   | 0.29–6.29                       |
| Yamagata                     | 1584                      | 0–56                    | 0.00–3.54                       |
| Fukushima                    | 2654                      | 3–41                    | 0.11–1.54                       |
| Ibaraki                      | 4059                      | 0–38                    | 0.00–0.94                       |
| Tochigi                      | 2654                      | 10–121                  | 0.38–4.56                       |
| Gunma                        | 2776                      | 15–75                   | 0.54–2.70                       |
| Saitama                      | 9697                      | 0–49                    | 0.00–0.51                       |
| Chiba                        | 8403                      | 12–192                  | 0.14–2.28                       |
| Tokyo                        | 15123                     | 0–86                    | 0.00–0.57                       |
| Kanagawa                     | 10953                     | 0–31                    | 0.00–0.28                       |
| Niigata                      | 3172                      | 0–18                    | 0.00–0.57                       |
| Toyama                       | 1524                      | 2–90                    | 0.13–5.91                       |
| Ishikawa                     | 1437                      | 5–57                    | 0.35–3.97                       |
| Fukui                        | 985                       | 0–9                     | 0.00–0.91                       |
| Yamanashi                    | 1147                      | 3–78                    | 0.26–6.80                       |
| Nagano                       | 2665                      | 2–61                    | 0.08–2.29                       |
| Gifu                         | 2794                      | 0–35                    | 0.00–1.25                       |
| Shizuoka                     | 5135                      | 0–70                    | 0.00–1.36                       |
| Aichi                        | 9345                      | 0–65                    | 0.00–0.70                       |
| Mie                          | 2513                      | 0–37                    | 0.00–1.47                       |
| Shiga                        | 1495                      | 10–60                   | 0.67–4.01                       |
| Kyoto                        | 3435                      | 0–83                    | 0.00–2.42                       |
| Osaka                        | 12792                     | 0–152                   | 0.00–1.19                       |
| Hyogo                        | 7320                      | 0–88                    | 0.00–1.20                       |
| Nara                         | 1838                      | 8–54                    | 0.44–2.94                       |
| Wakayama                     | 1509                      | 0–31                    | 0.00–2.05                       |
| Tottori                      | 724                       | 0–33                    | 0.00–4.56                       |
| Shimane                      | 983                       | 5–66                    | 0.51–6.71                       |
| Okayama                      | 2432                      | 0–62                    | 0.00–2.55                       |
| Hiroshima                    | 3535                      | 0–76                    | 0.00–2.15                       |
| Yamaguchi                    | 2148                      | 0–64                    | 0.00–2.98                       |
| Tokushima                    | 1075                      | 7–48                    | 0.65–4.47                       |
| Kagawa                       | 1330                      | 0–51                    | 0.00–3.83                       |
| Ehime                        | 2021                      | 0–72                    | 0.00–3.56                       |
| Kochi                        | 1068                      | 2–69                    | 0.19–6.46                       |
| Fukuoka                      | 6191                      | 0–27                    | 0.00–0.44                       |
| Saga                         | 1085                      | 2–54                    | 0.18–4.98                       |
| Nagasaki                     | 1959                      | 6–95                    | 0.31–4.85                       |
| Kumamoto                     | 2119                      | 0–44                    | 0.00–2.08                       |
| Oita                         | 1561                      | 0–75                    | 0.00–4.80                       |
| Miyazaki                     | 1470                      | 5–68                    | 0.34–4.63                       |
| Kagoshima                    | 2167                      | 1–58                    | 0.05–2.68                       |
| Okinawa                      | 1331                      | 0–60                    | 0.00–4.51                       |
| <b>(6) 85 years or older</b> |                           |                         |                                 |
| Japan                        | 291637                    | 73–2466                 | 0.03–0.85                       |
| Hokkaido                     | 13311                     | 0–32                    | 0.00–0.24                       |
| Aomori                       | 3671                      | 0–23                    | 0.00–0.63                       |
| Iwate                        | 3987                      | 0–37                    | 0.00–0.93                       |
| Miyagi                       | 5384                      | 0–26                    | 0.00–0.48                       |
| Akita                        | 3608                      | 0–3                     | 0.00–0.08                       |
| Yamagata                     | 3737                      | 0–39                    | 0.00–1.04                       |
| Fukushima                    | 5599                      | 0–23                    | 0.00–0.41                       |
| Ibaraki                      | 6834                      | 0–43                    | 0.00–0.63                       |
| Tochigi                      | 4565                      | 0–39                    | 0.00–0.85                       |
| Gunma                        | 5135                      | 5–108                   | 0.10–2.10                       |
| Saitama                      | 12512                     | 0–129                   | 0.00–1.03                       |
| Chiba                        | 11583                     | 21–185                  | 0.18–1.60                       |
| Tokyo                        | 24170                     | 26–200                  | 0.11–0.83                       |
| Kanagawa                     | 16272                     | 0–46                    | 0.00–0.28                       |
| Niigata                      | 7001                      | 0–31                    | 0.00–0.44                       |
| Toyama                       | 3046                      | 4–63                    | 0.13–2.07                       |



| Age group, area | Observed all-cause deaths | Excess all-cause deaths | Percent all-cause excess deaths |
|-----------------|---------------------------|-------------------------|---------------------------------|
| Ishikawa        | 2938                      | 0–24                    | 0.00–0.82                       |
| Fukui           | 2274                      | 7–34                    | 0.31–1.50                       |
| Yamanashi       | 2316                      | 6–40                    | 0.26–1.73                       |
| Nagano          | 6378                      | 0–11                    | 0.00–0.17                       |
| Gifu            | 5106                      | 0–37                    | 0.00–0.72                       |
| Shizuoka        | 9232                      | 0–42                    | 0.00–0.45                       |
| Aichi           | 13794                     | 0–106                   | 0.00–0.77                       |
| Mie             | 4666                      | 0–42                    | 0.00–0.90                       |
| Shiga           | 2929                      | 2–49                    | 0.07–1.67                       |
| Kyoto           | 5900                      | 0–51                    | 0.00–0.86                       |
| Osaka           | 17046                     | 0–104                   | 0.00–0.61                       |
| Hyogo           | 12481                     | 0–71                    | 0.00–0.57                       |
| Nara            | 3300                      | 0–69                    | 0.00–2.09                       |
| Wakayama        | 2888                      | 0–49                    | 0.00–1.70                       |
| Tottori         | 1769                      | 0–46                    | 0.00–2.60                       |
| Shimane         | 2488                      | 0–58                    | 0.00–2.33                       |
| Okayama         | 5089                      | 0–39                    | 0.00–0.77                       |
| Hiroshima       | 6781                      | 0–7                     | 0.00–0.10                       |
| Yamaguchi       | 4261                      | 0–7                     | 0.00–0.16                       |
| Tokushima       | 2362                      | 0–36                    | 0.00–1.52                       |
| Kagawa          | 2903                      | 2–78                    | 0.07–2.69                       |
| Ehime           | 4201                      | 0–16                    | 0.00–0.38                       |
| Kochi           | 2417                      | 0–40                    | 0.00–1.65                       |
| Fukuoka         | 11542                     | 0–141                   | 0.00–1.22                       |
| Saga            | 2415                      | 0–39                    | 0.00–1.61                       |
| Nagasaki        | 4076                      | 0–28                    | 0.00–0.69                       |
| Kumamoto        | 5311                      | 0–10                    | 0.00–0.19                       |
| Oita            | 3521                      | 0–29                    | 0.00–0.82                       |
| Miyazaki        | 3339                      | 0–78                    | 0.00–2.34                       |
| Kagoshima       | 5102                      | 0–9                     | 0.00–0.18                       |
| Okinawa         | 2397                      | 0–49                    | 0.00–2.04                       |

\*The national-level cumulative number of excess all-cause deaths was calculated by summing those of 47 prefectures. Due to the fact that the adjusted number of deaths was rounded up to the integer, the sum of the values by age groups does not necessarily equal that of all ages.

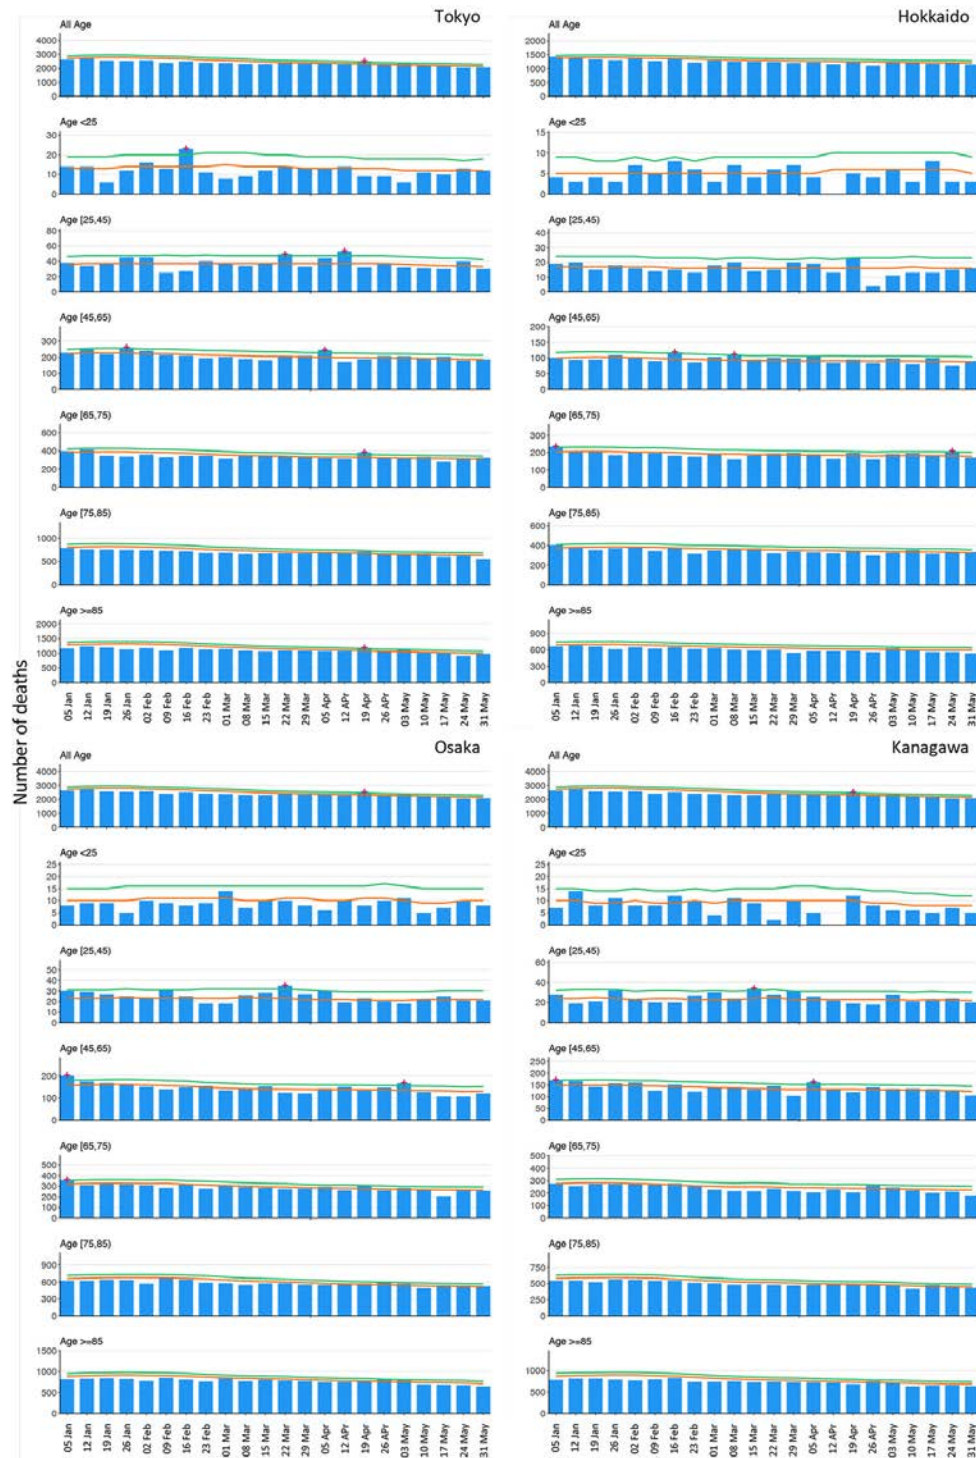

**Appendix Figure 1.** Observed and expected number of all-cause deaths in four prefectures with large number of reported COVID19 deaths for all ages and by age group, from January 2020 (December 30, 2019 to January 5, 2020) to May 2020 (May 25 to 31, 2020). Blue: observed; Green: upper bound;

Orange: point estimate; cross symbols indicate weeks with the observed exceeding the 95% upper bound. To the national-level data, the observed and expected number of all-cause deaths for each prefecture were summed for each week, which were then used to calculate the weekly national-level excess deaths.

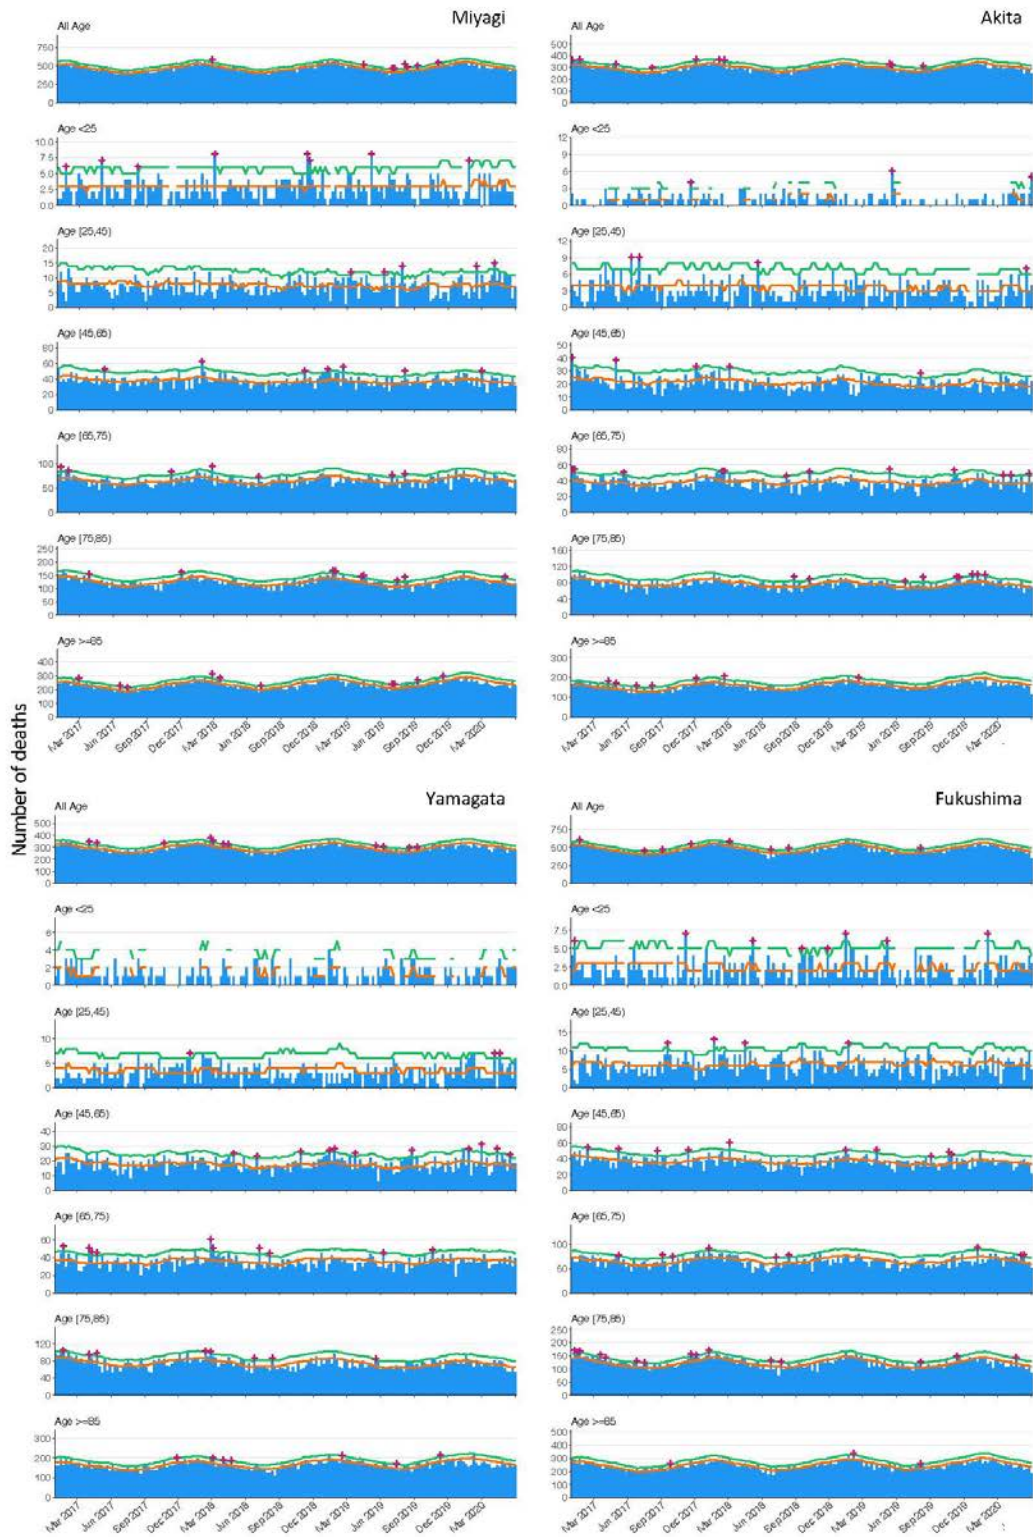

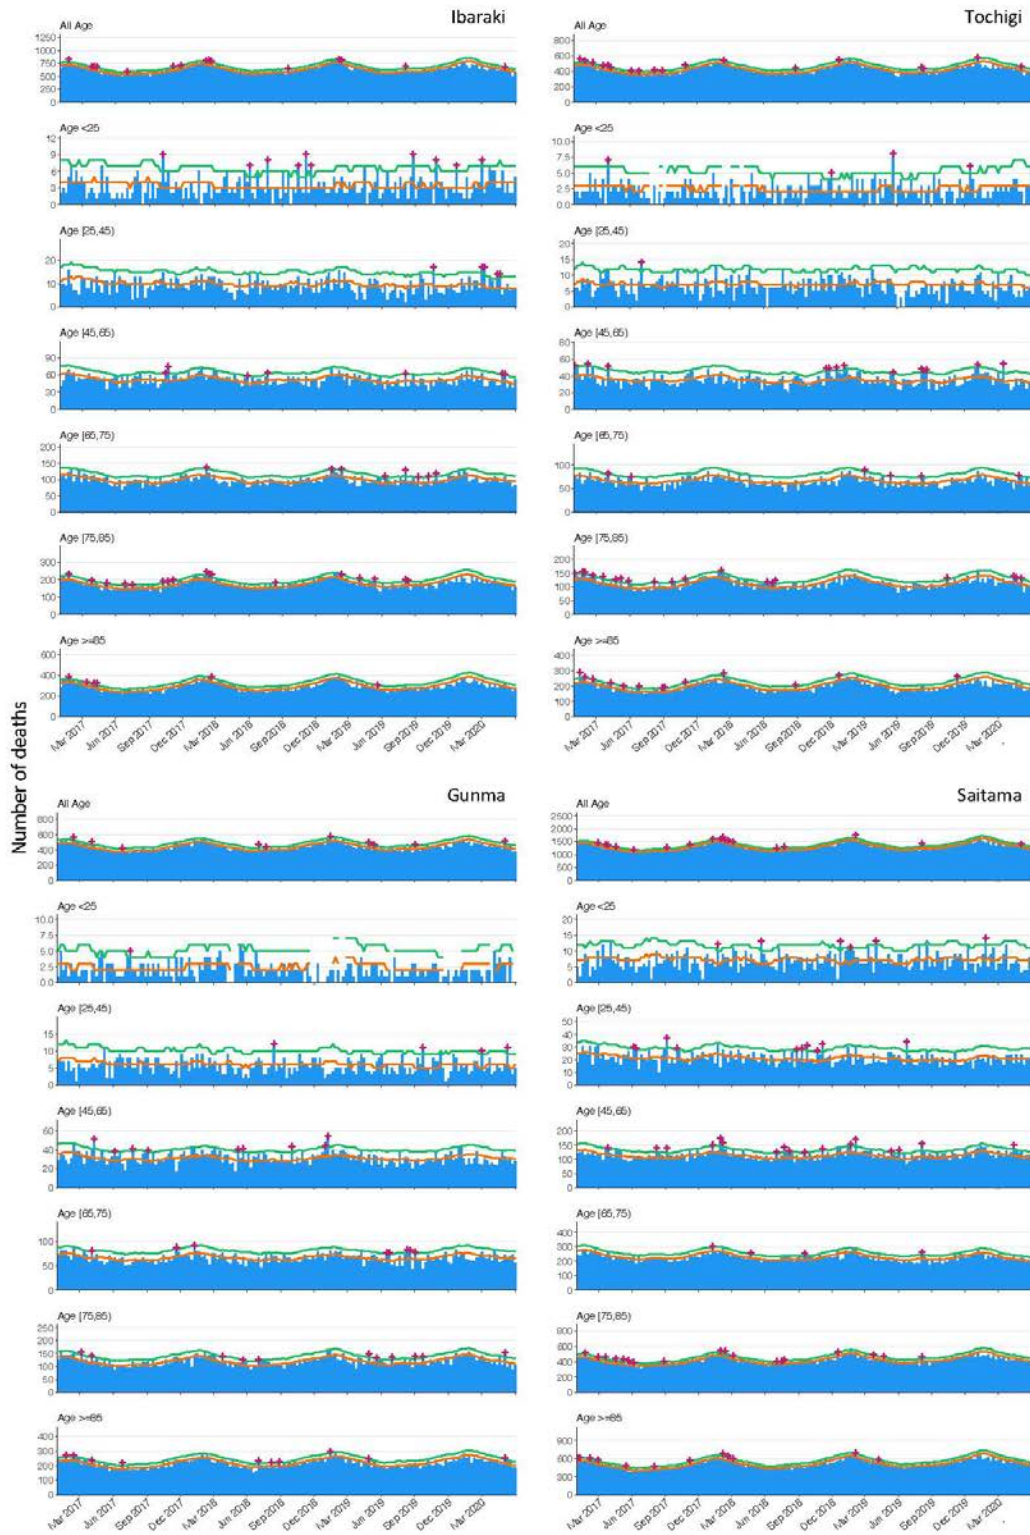

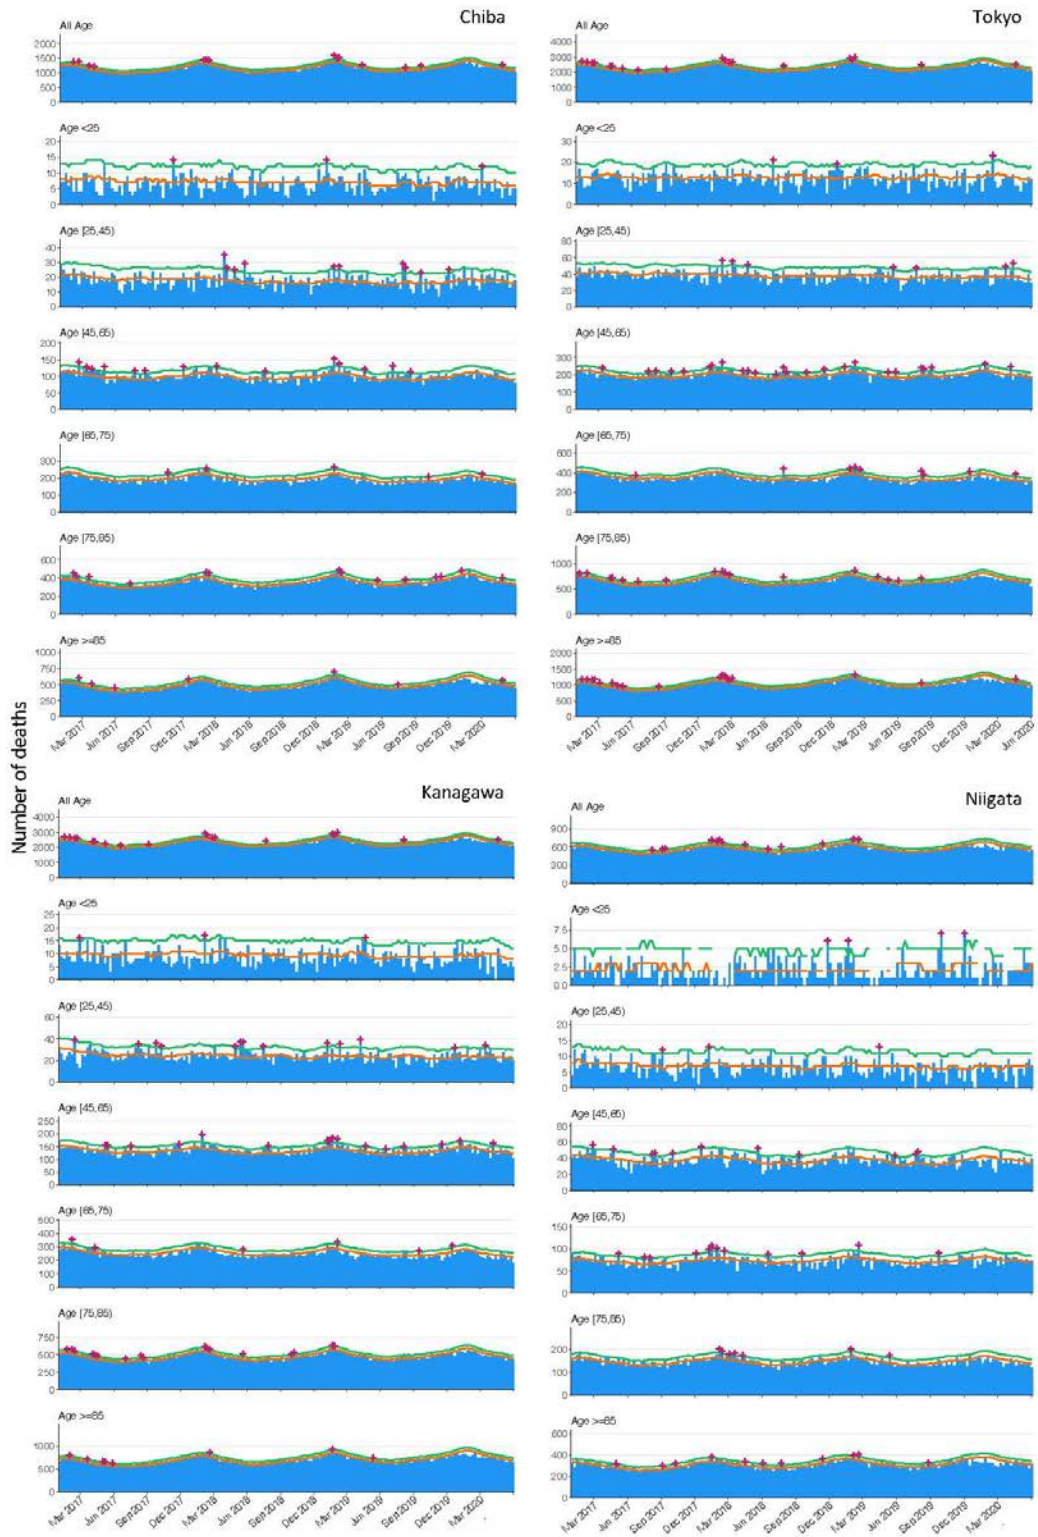

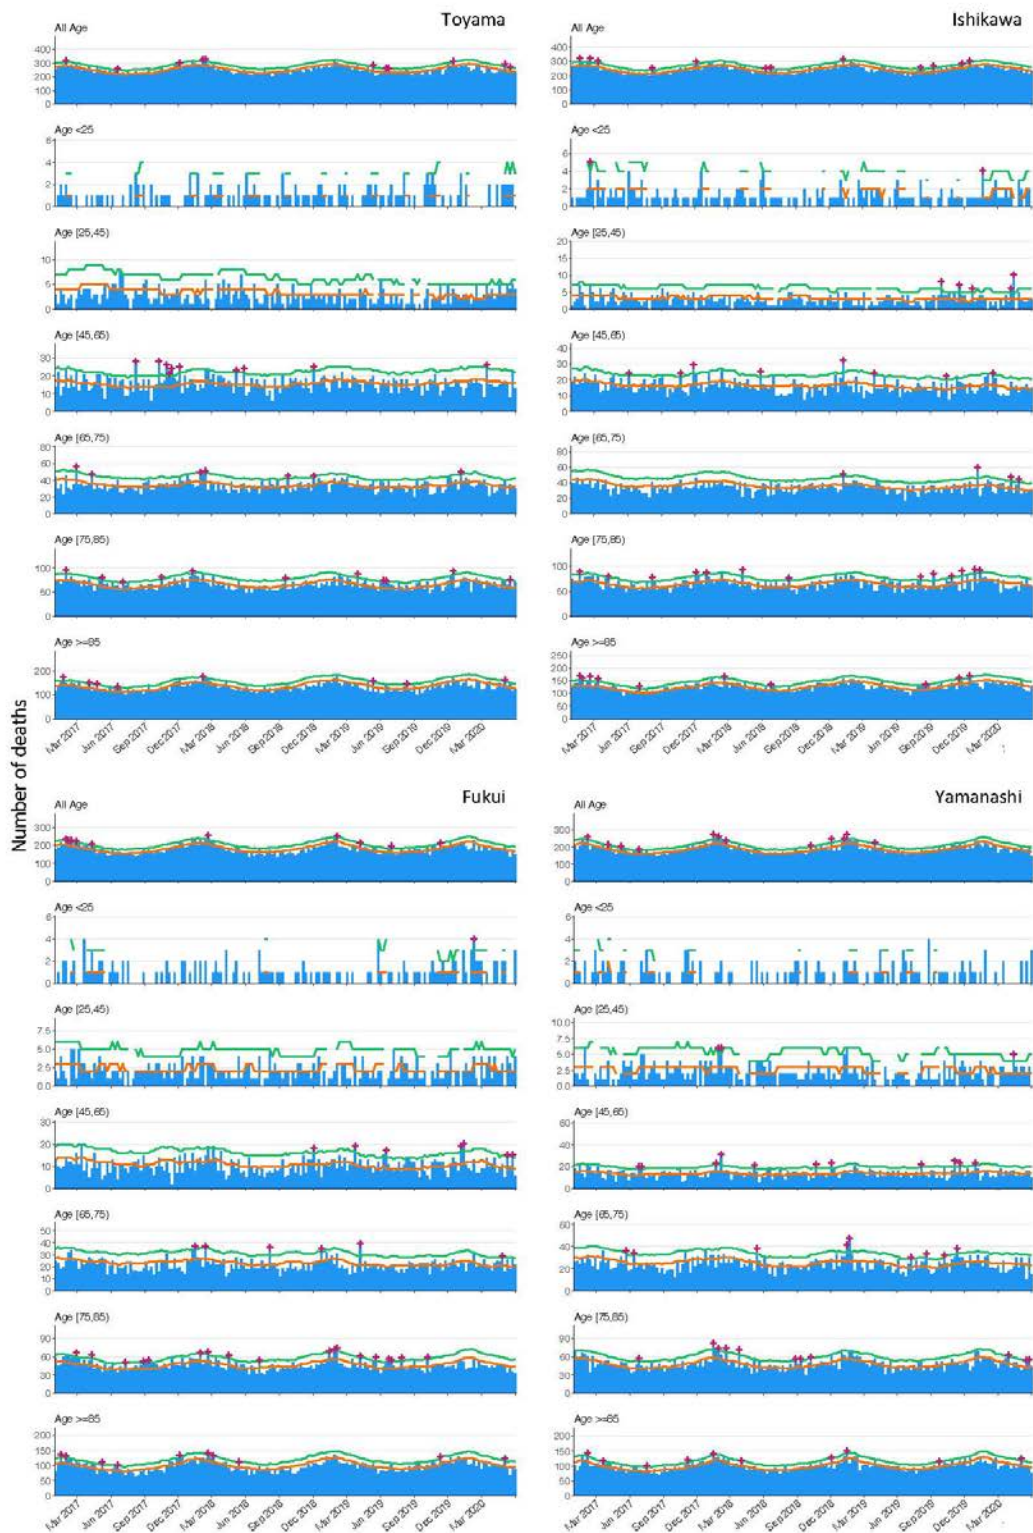

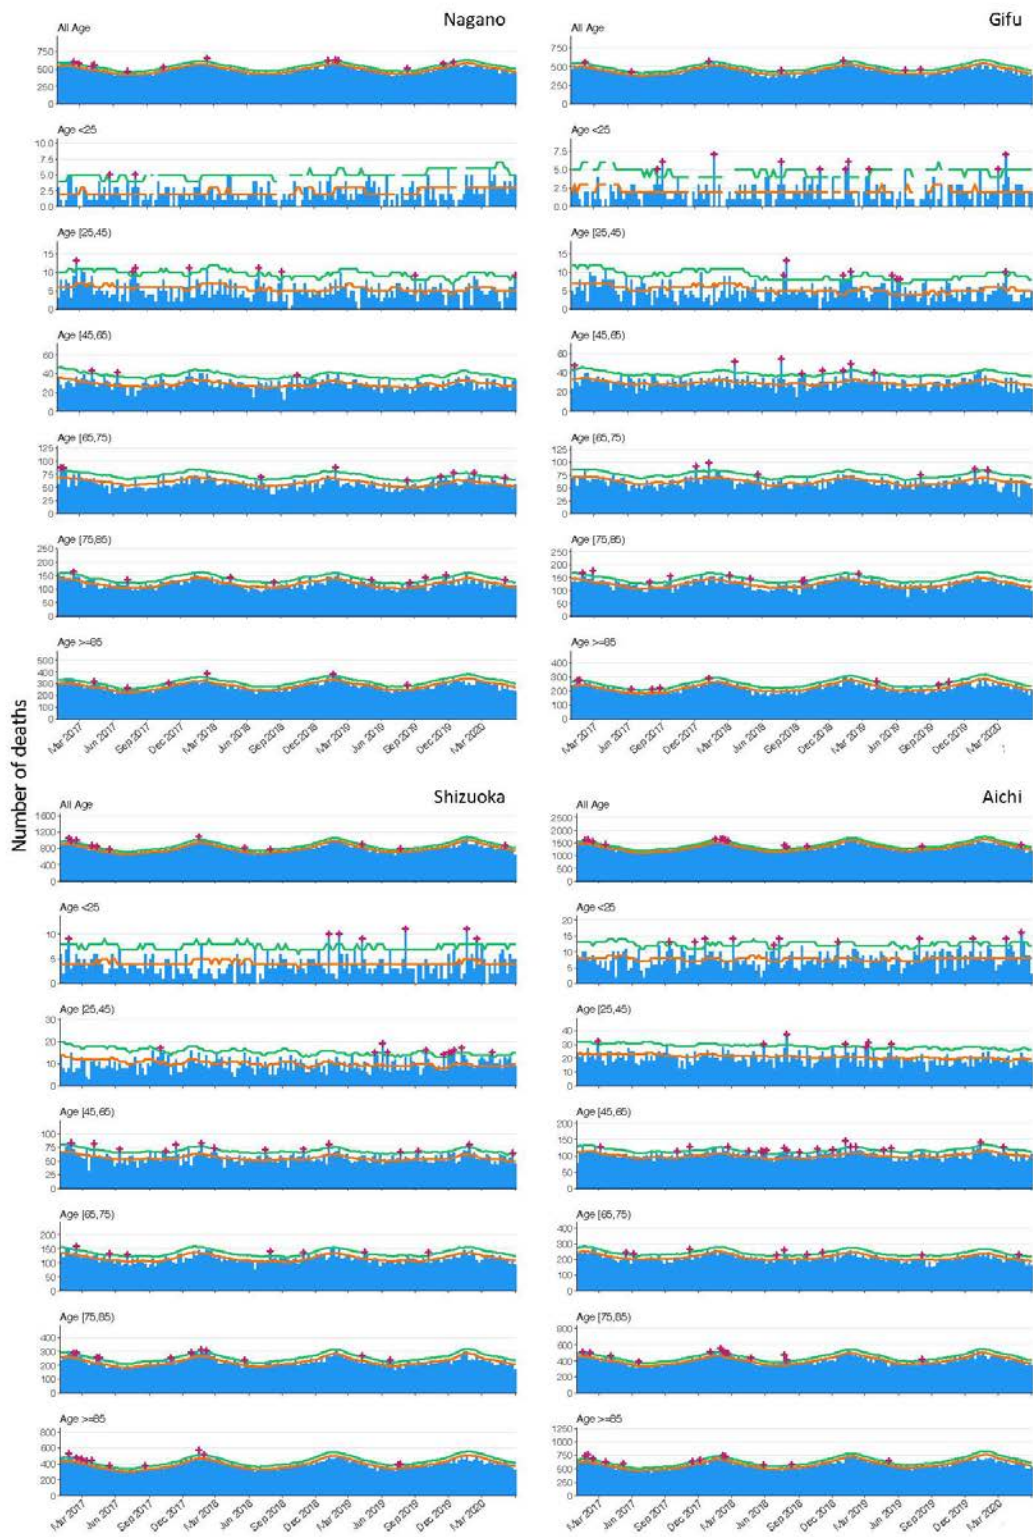



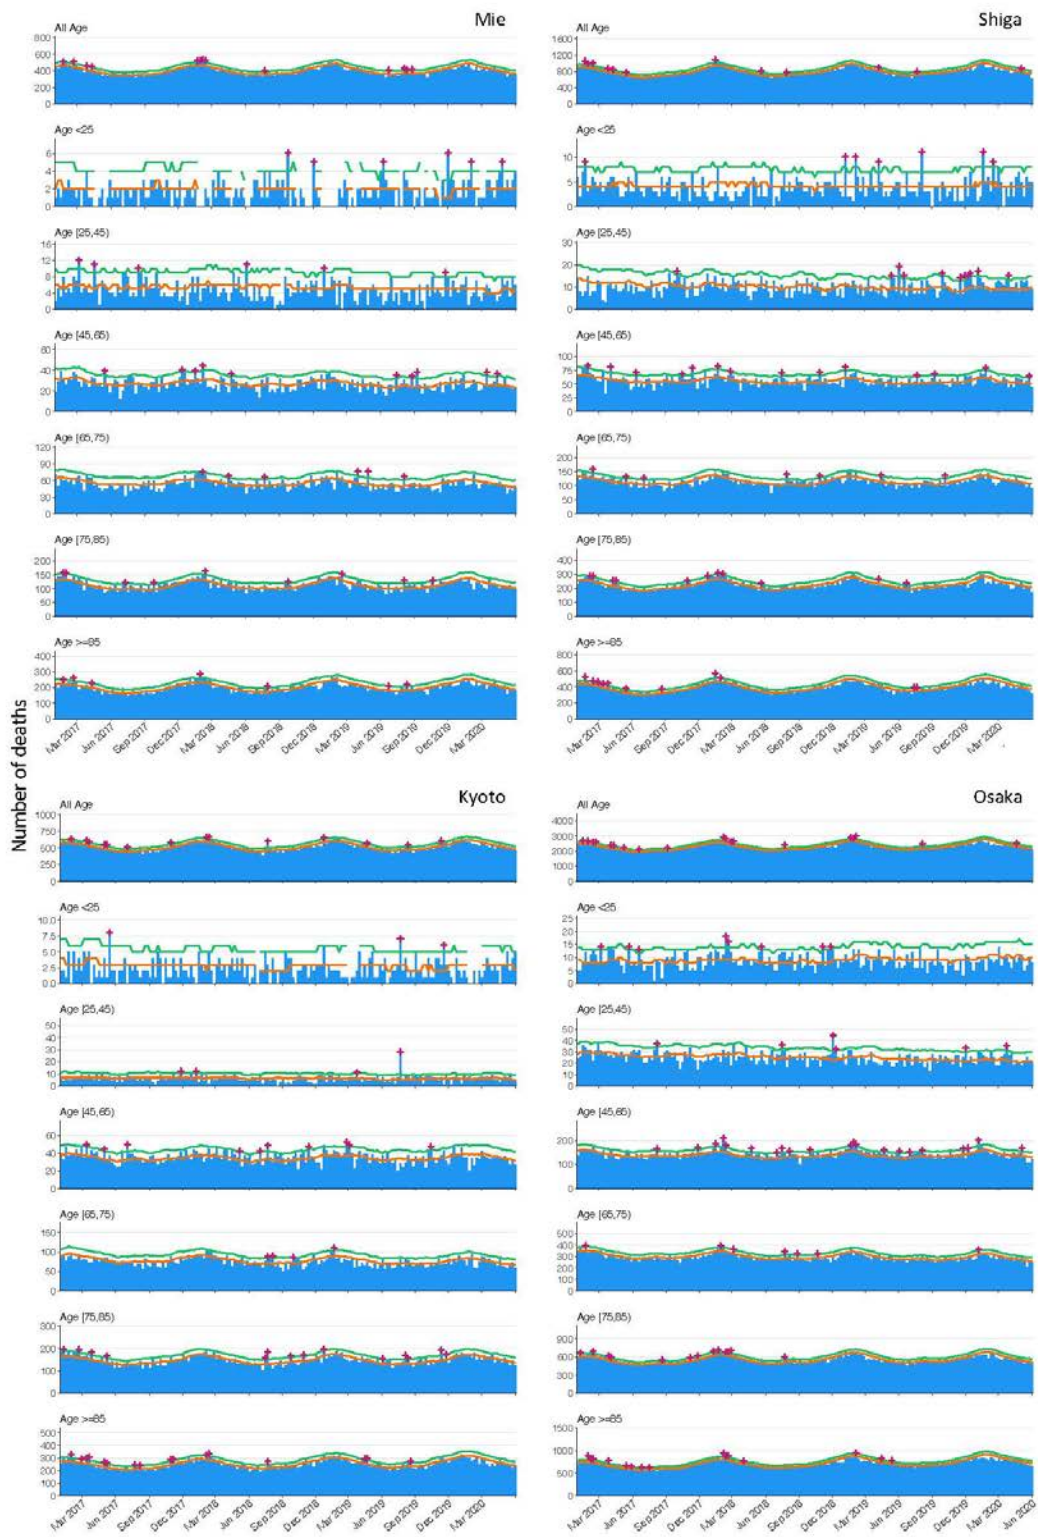

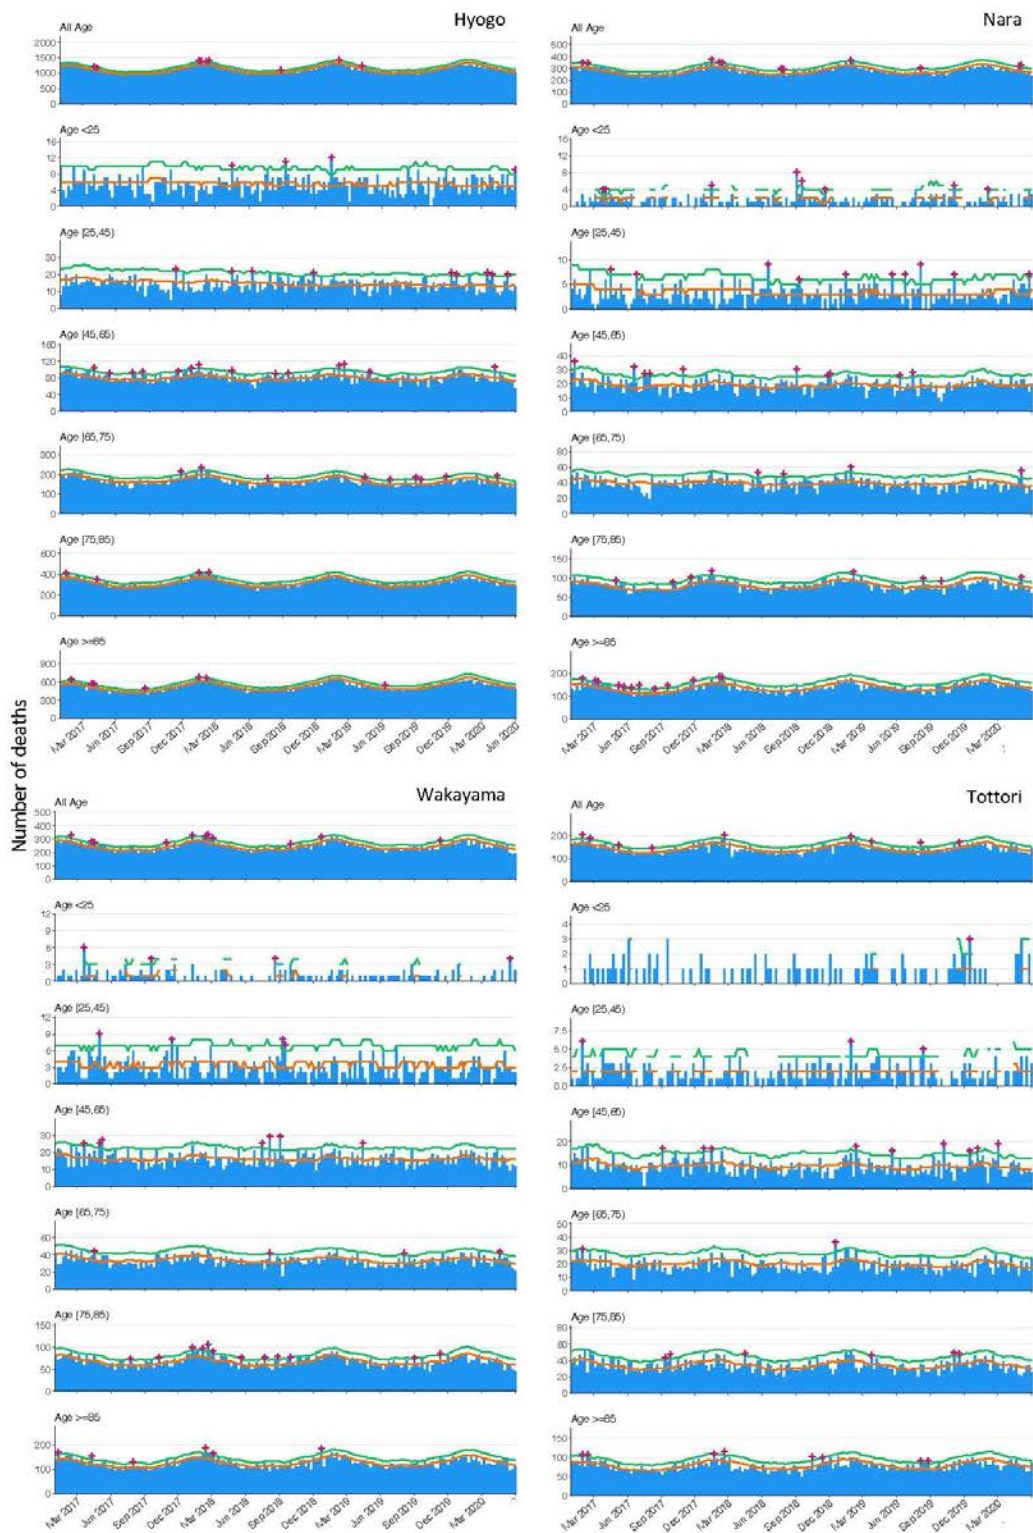

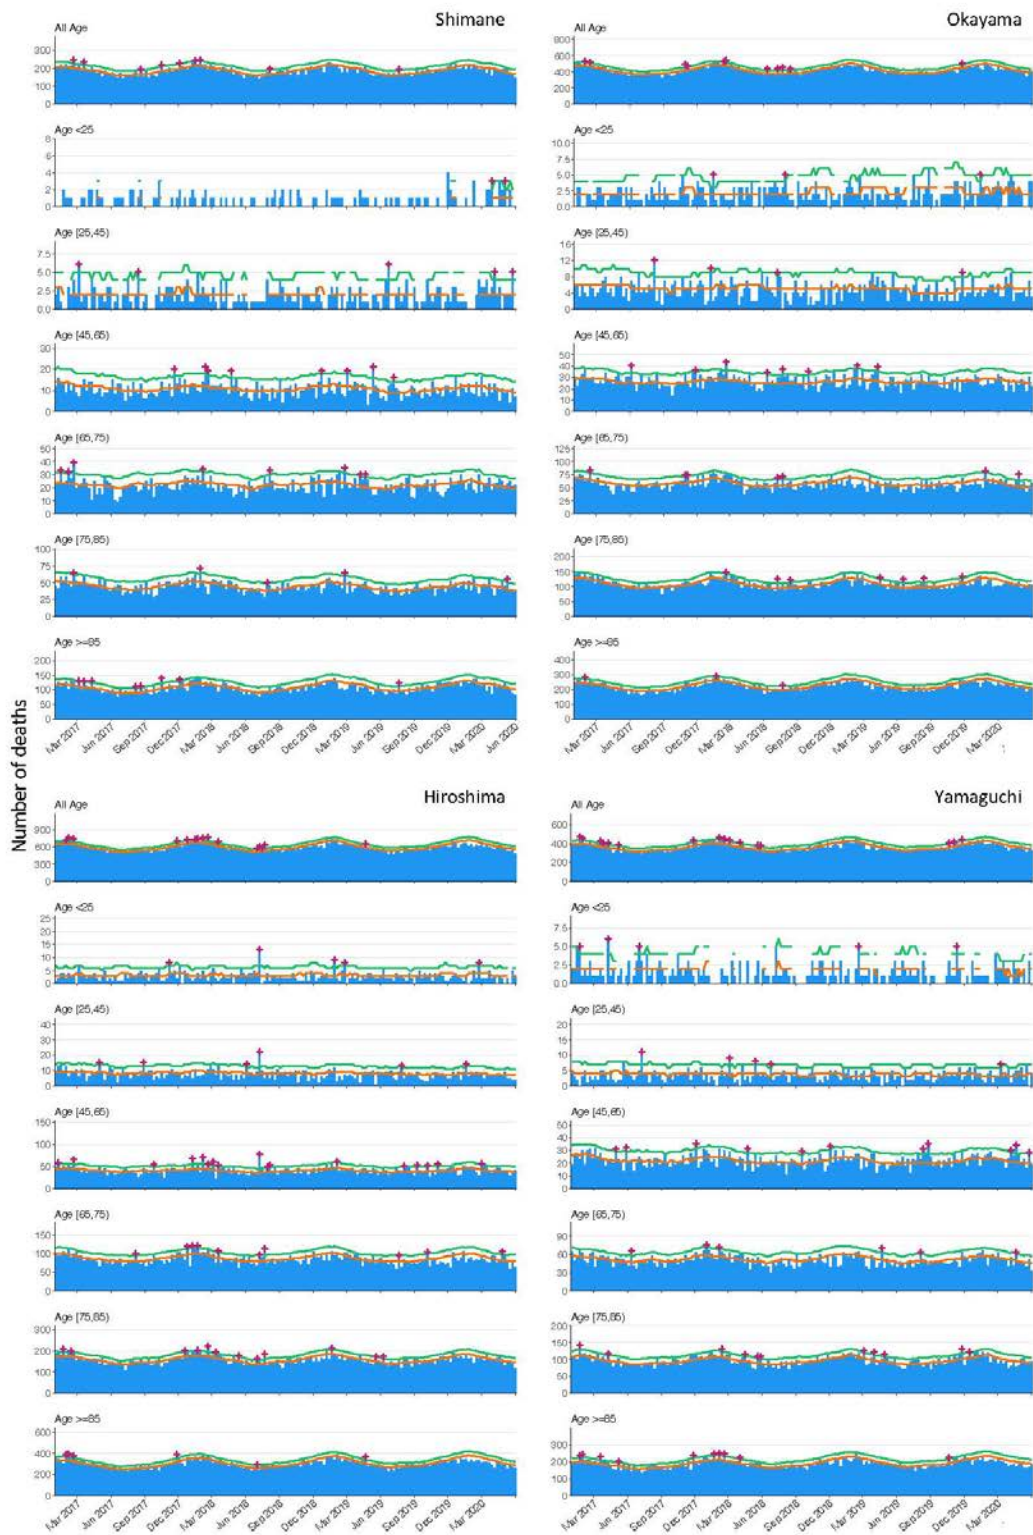

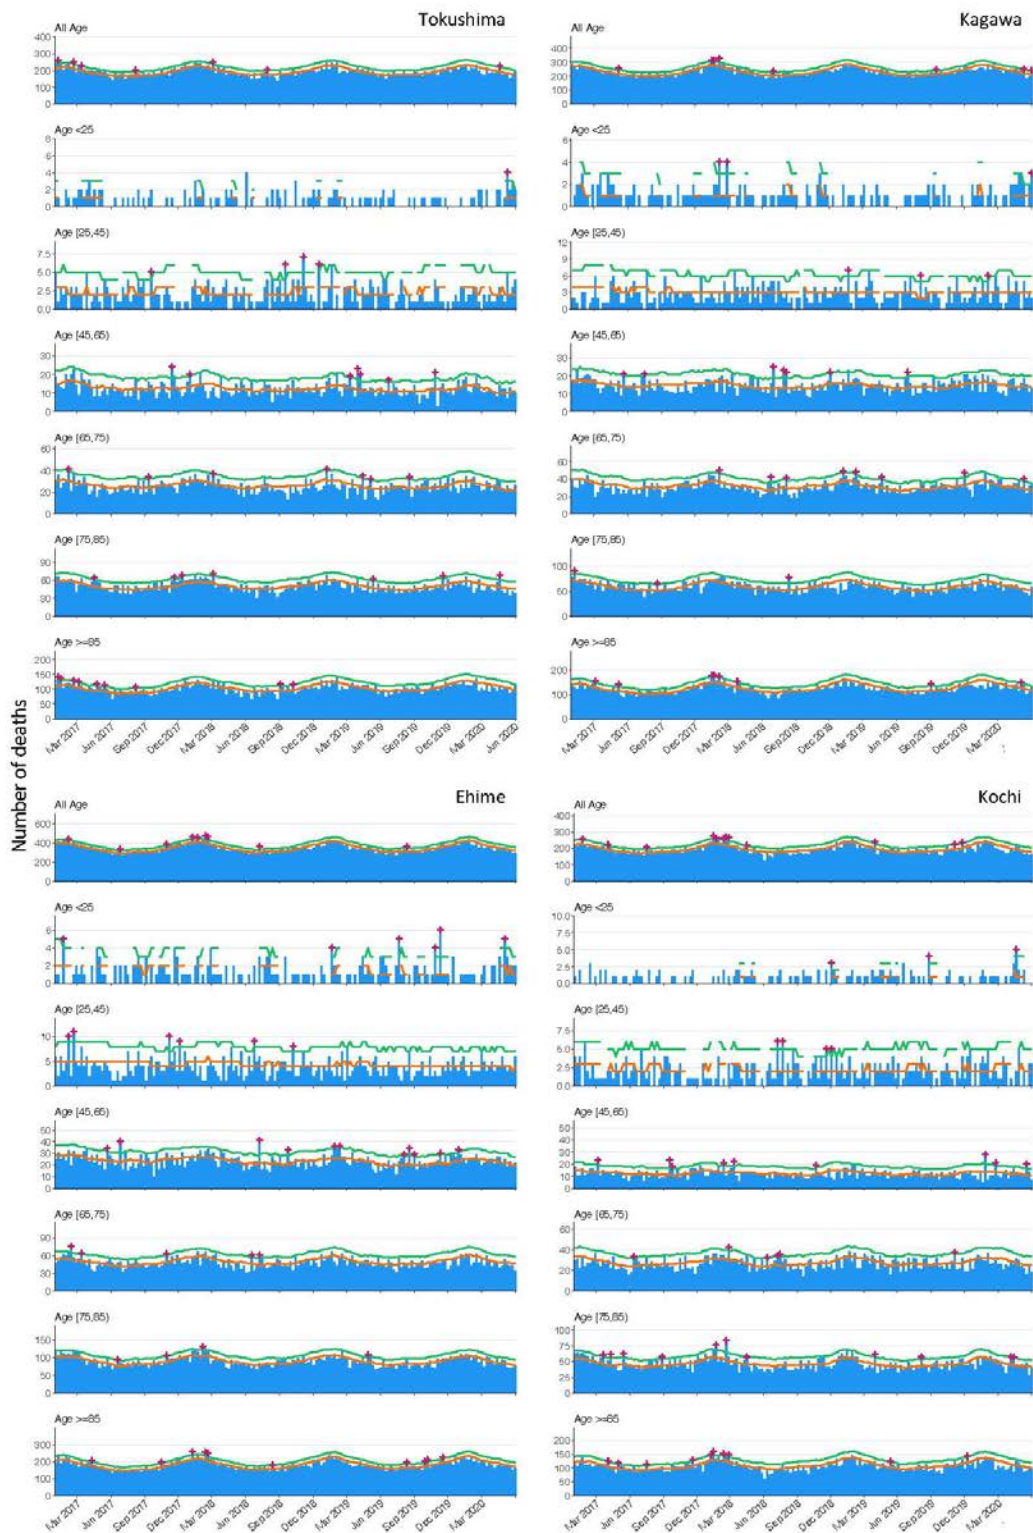

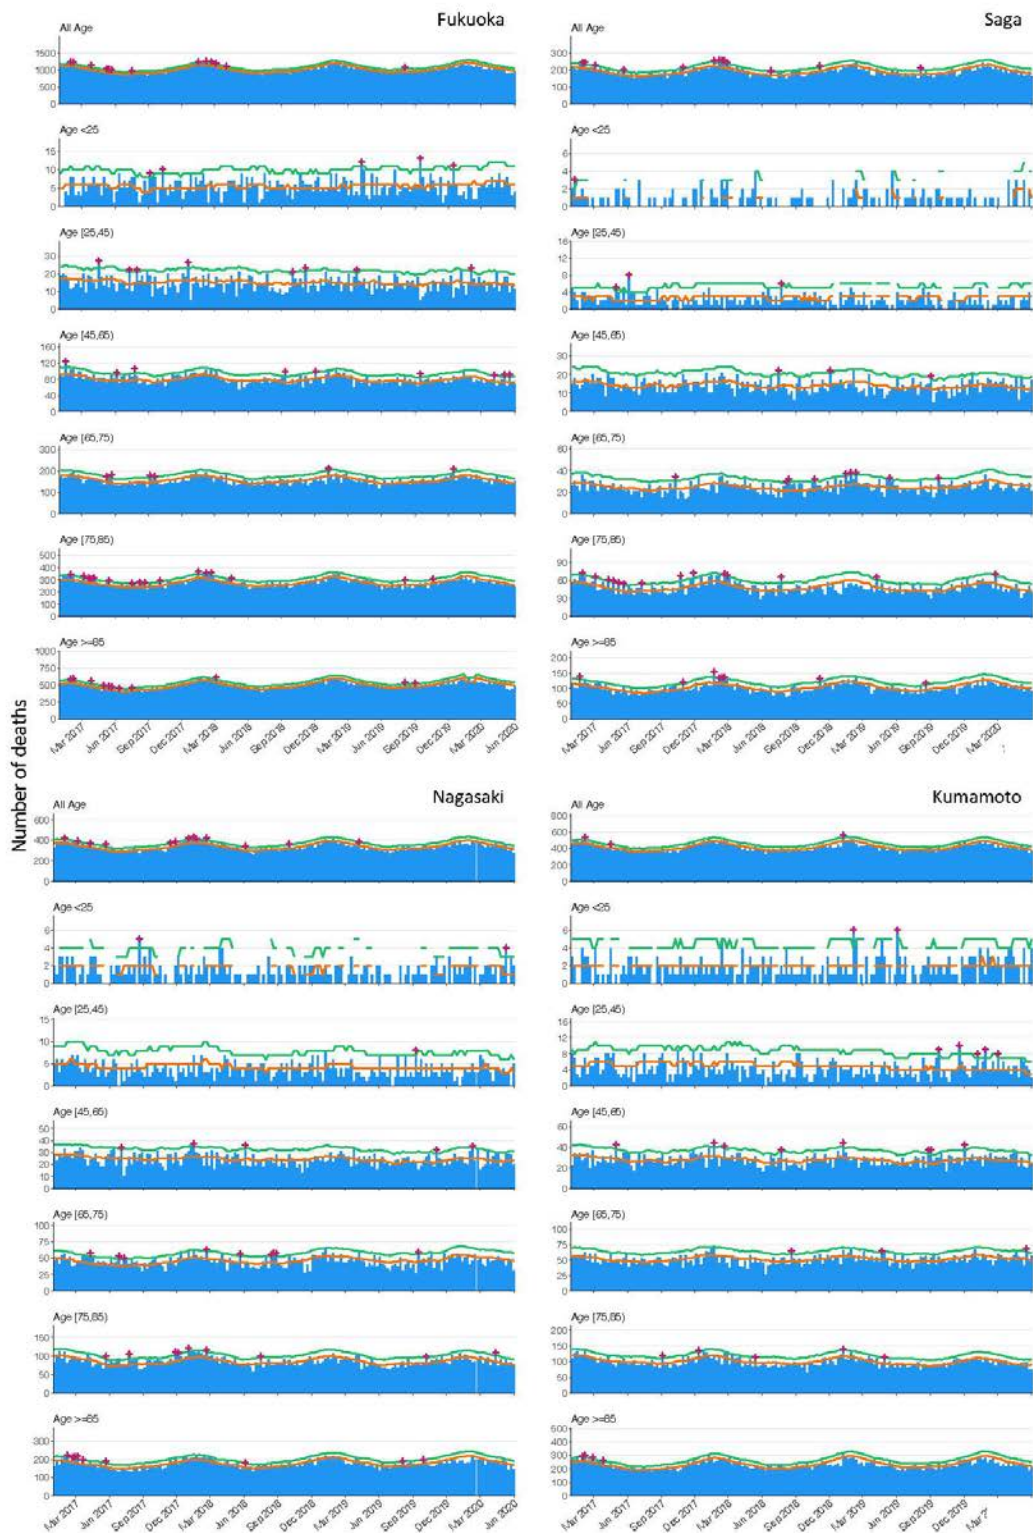

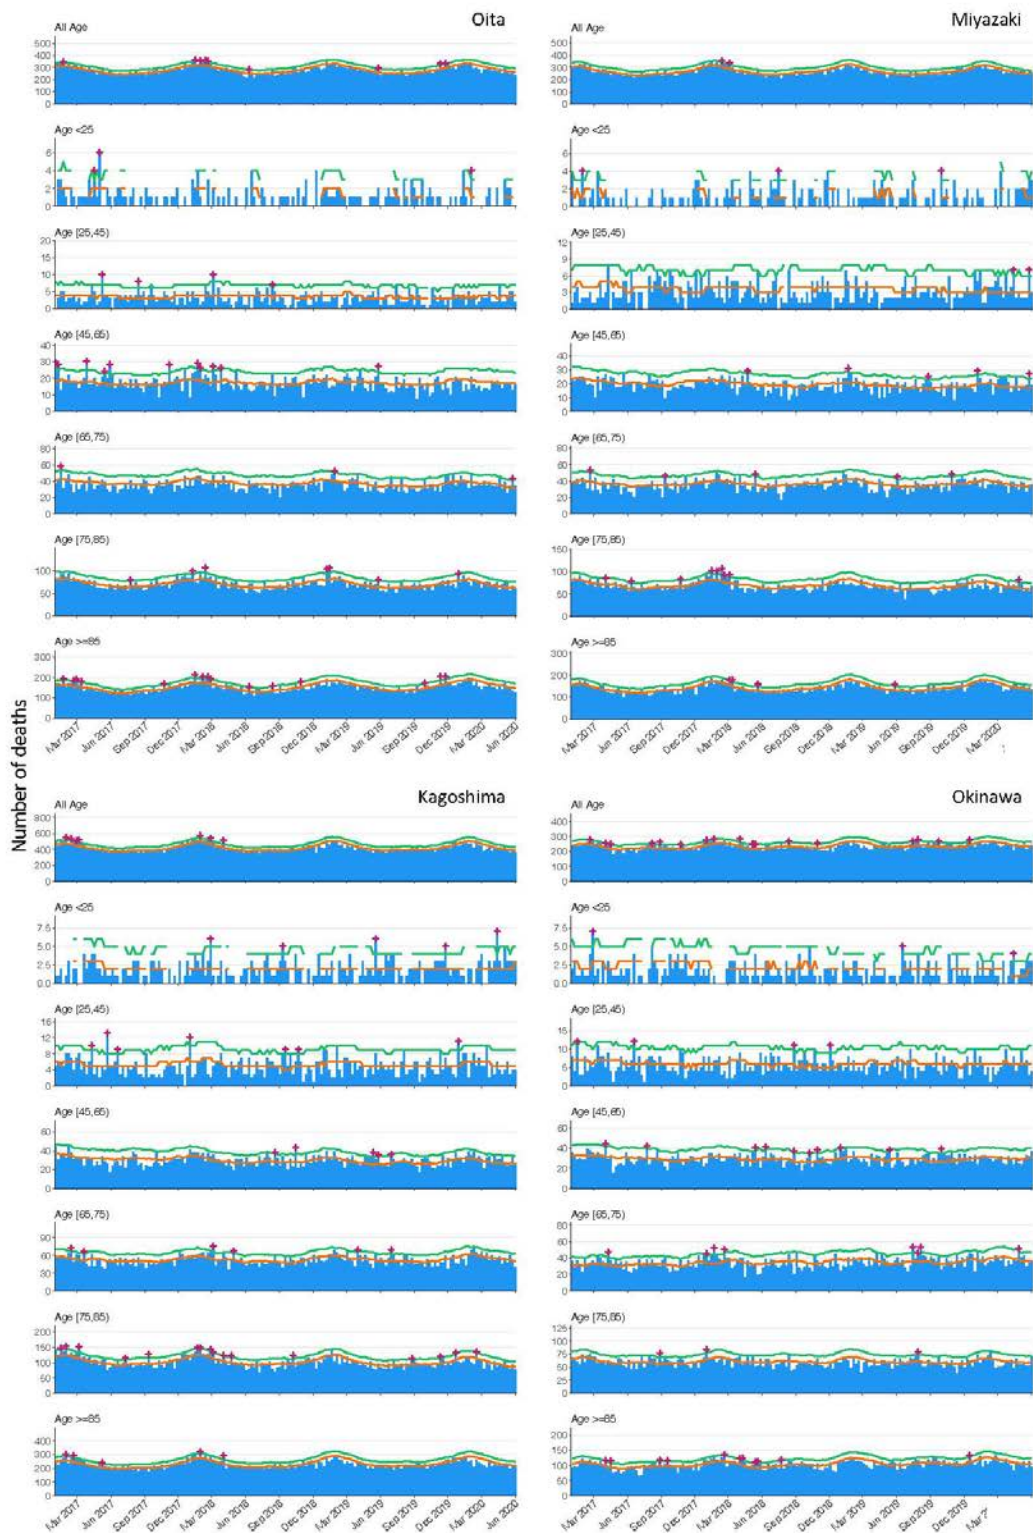

**Appendix Figure 2.** Observed and expected number of all-cause deaths in the national level and 47 prefectures for all ages and by age group, from January 2017 (December 26, 2016 to January 1, 2017) to May 2020 (May 25 to 31, 2020). Blue: observed; Green: upper bound; Orange: point estimate; cross symbols indicate weeks with the observed exceeding the 95% upper bound. To obtain the national-level data, the observed and expected number of all-cause deaths for each prefecture were summed for each week, which were then used to calculate the weekly national-level excess deaths.
